# Supplementary material
Source: PubMed Central journal article supplement (PMC9022944)

**Extended Data Fig. 2a**

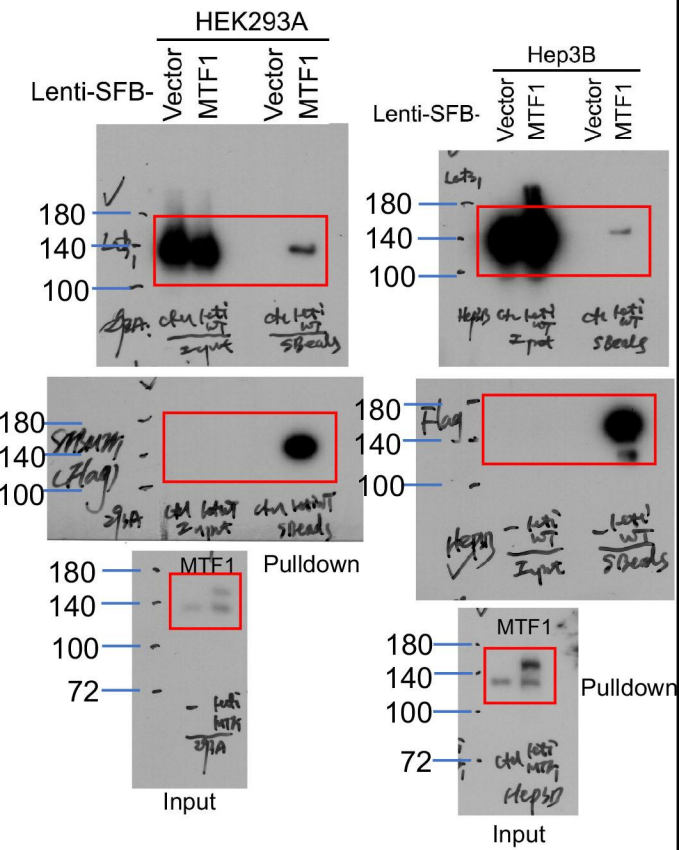

**Extended Data Fig. 2b**

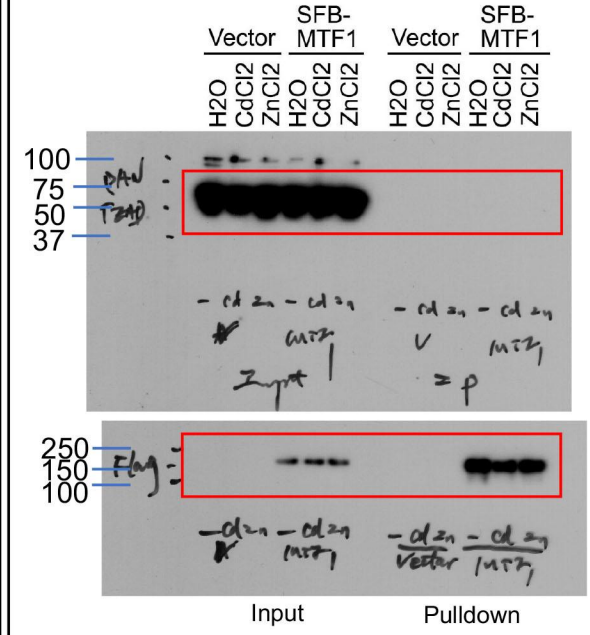

**Extended Data Fig. 2c**

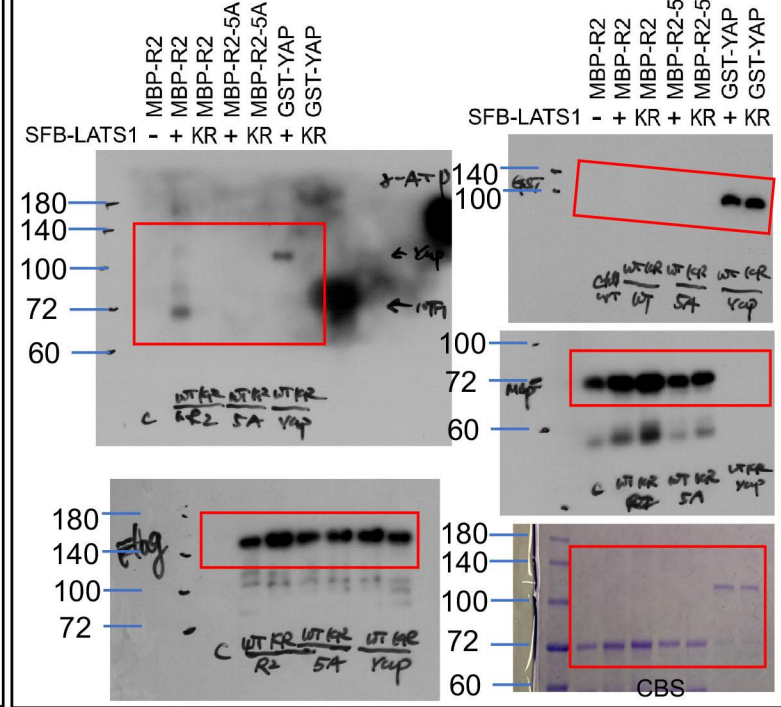

**Extended Data Fig. 2e**

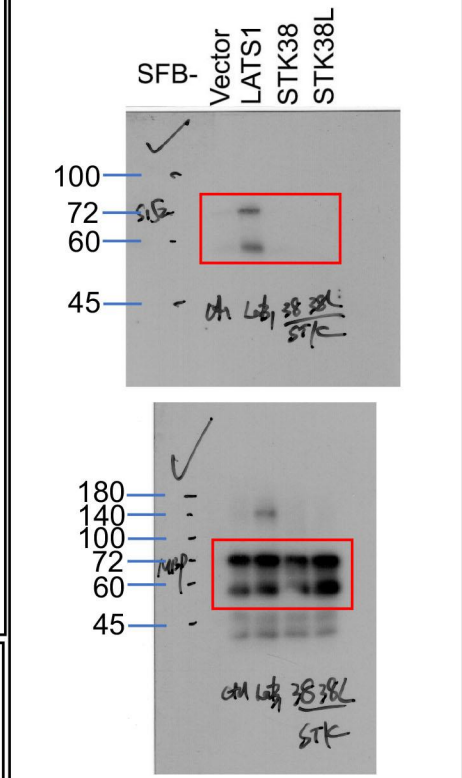

**Extended Data Fig. 2d**

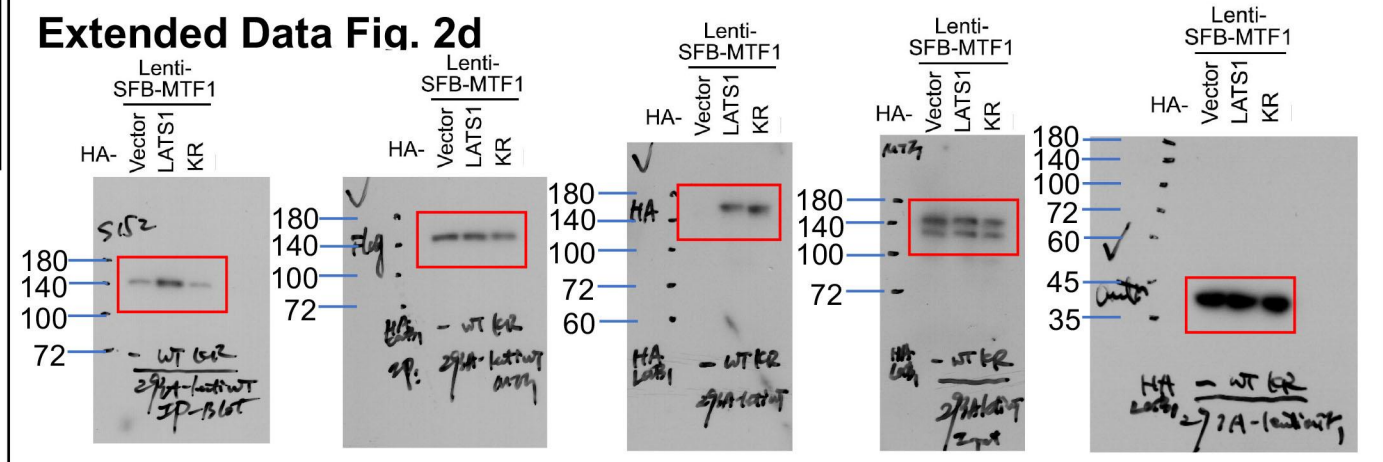

Supplement: NIHMS1789257-supplement-1789257_SD_ED_Fig_2_unprocessed_blots.pdf [file NIHMS1789257-supplement-1789257_SD_ED_Fig_2_unprocessed_blots.pdf]
