# Supplementary material
Source: PubMed Central journal article supplement (PMC9022944)

**Extended Data Fig. 4b**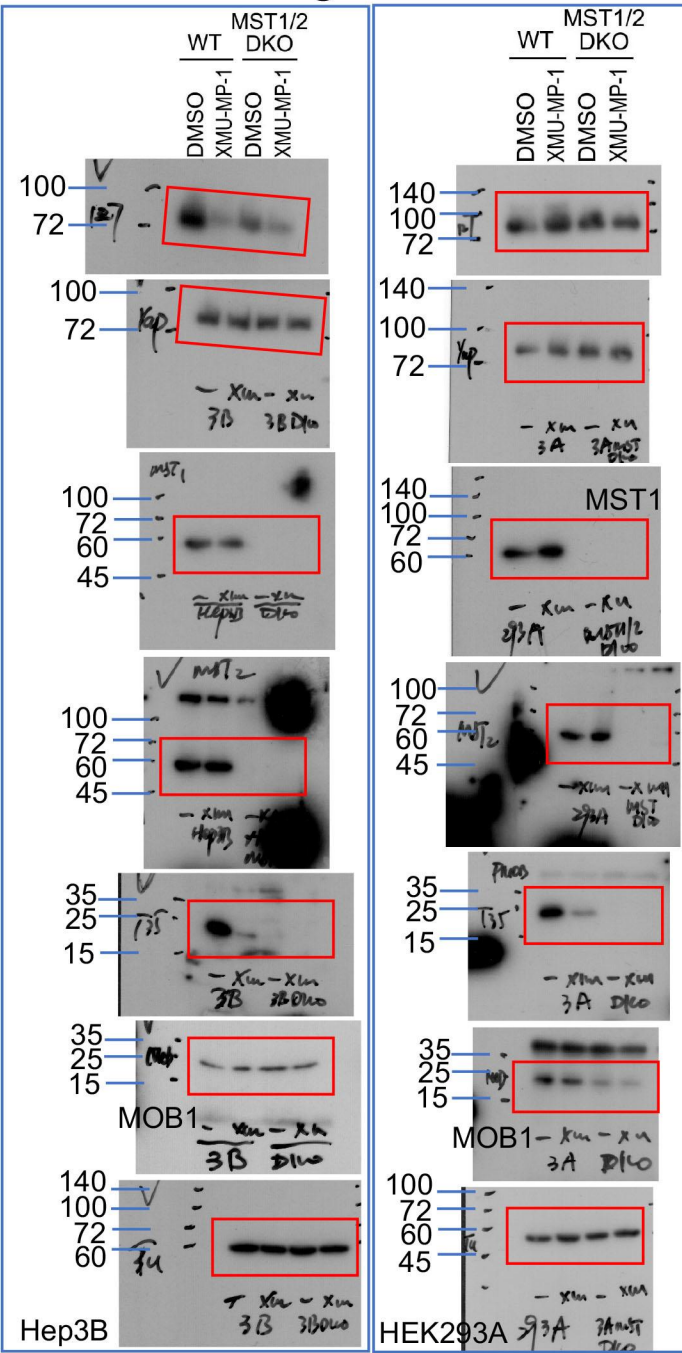**Extended Data Fig. 4e**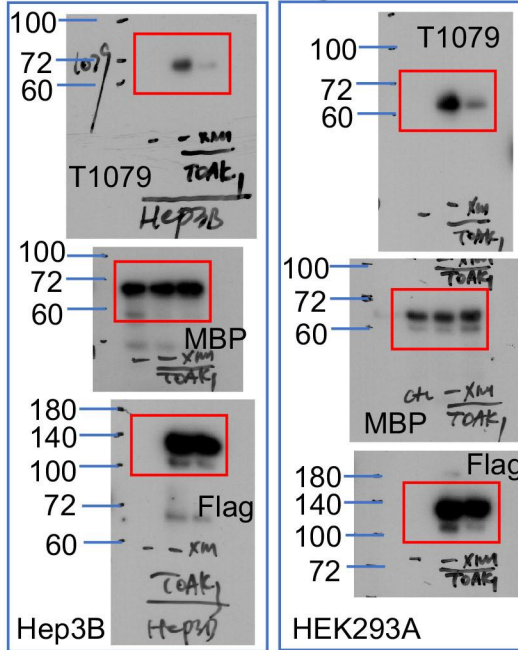**Extended Data Fig. 4f**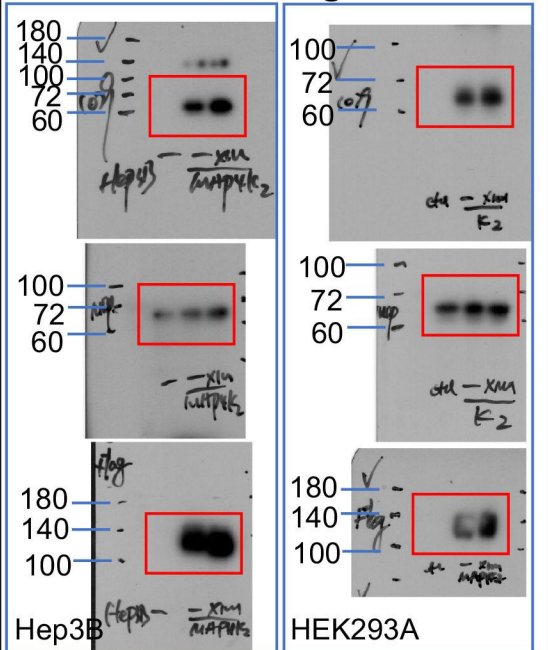**Extended Data Fig. 4g**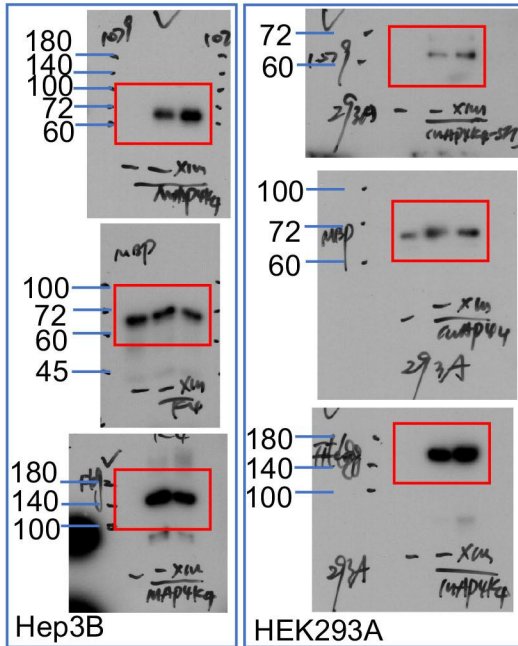**Extended Data Fig. 4h**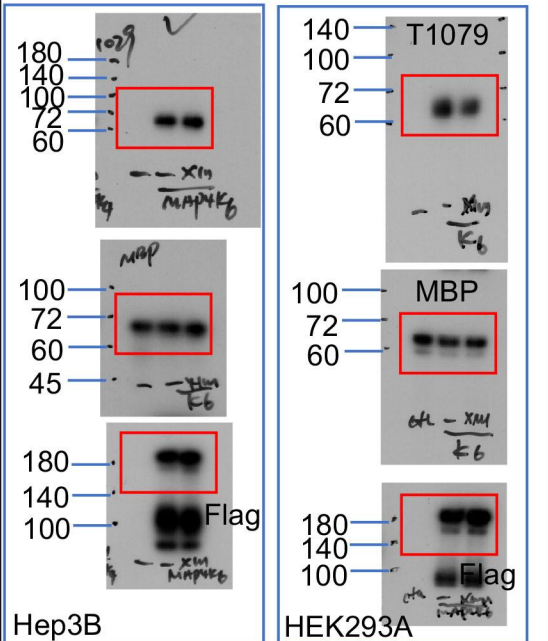

Supplement: NIHMS1789257-supplement-1789257_SD_ED_Fig_4_unprocessed_blots.pdf [file NIHMS1789257-supplement-1789257_SD_ED_Fig_4_unprocessed_blots.pdf]
