# Supplementary material
Source: PubMed Central journal article supplement (PMC9022944)

**Extended Data Fig. 7b**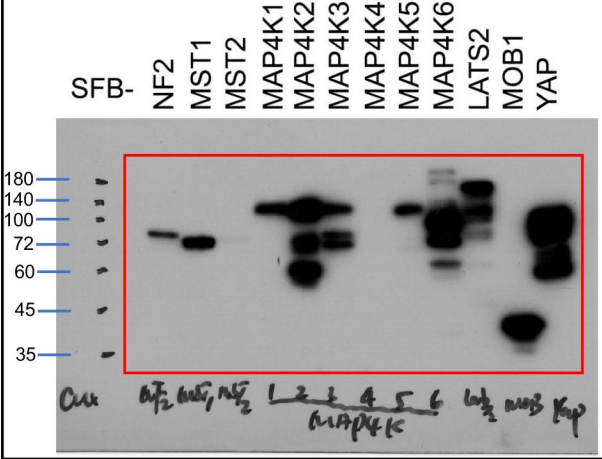**Extended Data Fig. 7c**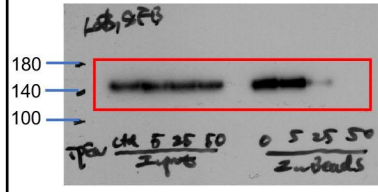**Extended Data Fig. 7d**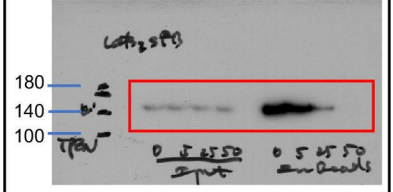**Extended Data Fig. 7e**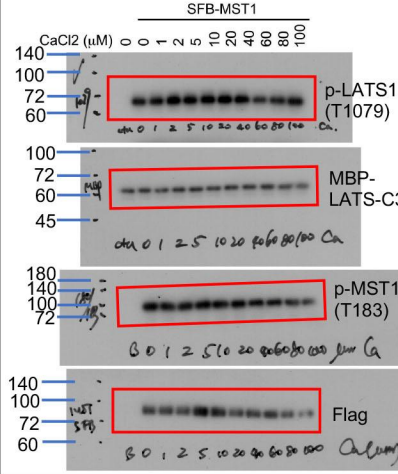**Extended Data Fig. 7f**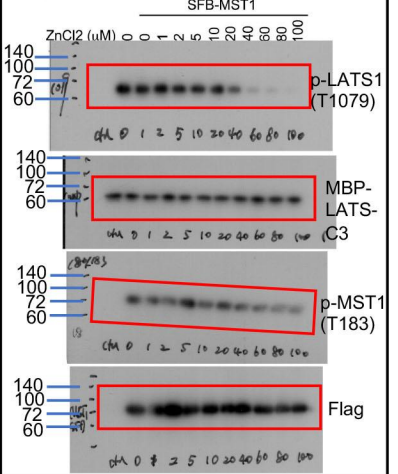**Extended Data Fig. 7g**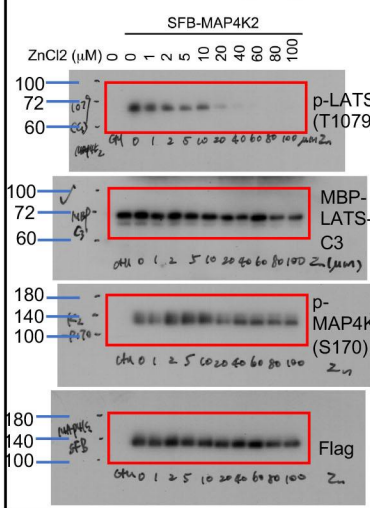**Extended Data Fig. 7h**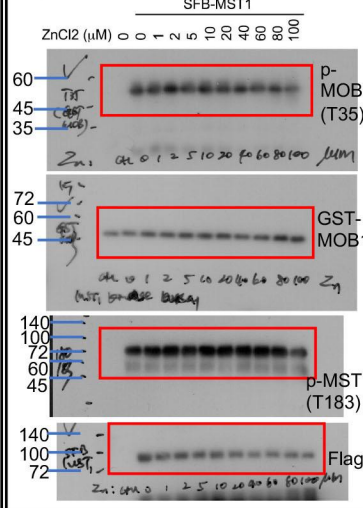**Extended Data Fig. 7i**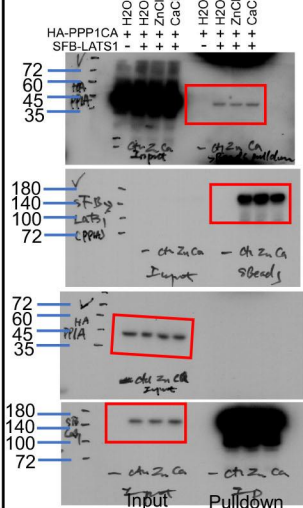**Extended Data Fig. 7j**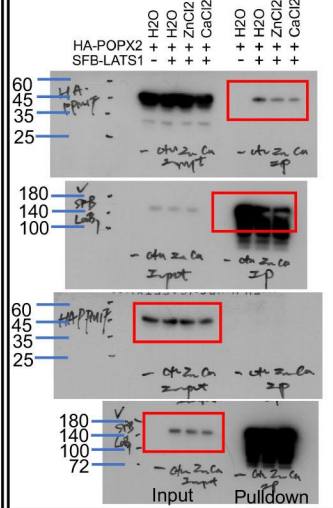**Extended Data Fig. 7k**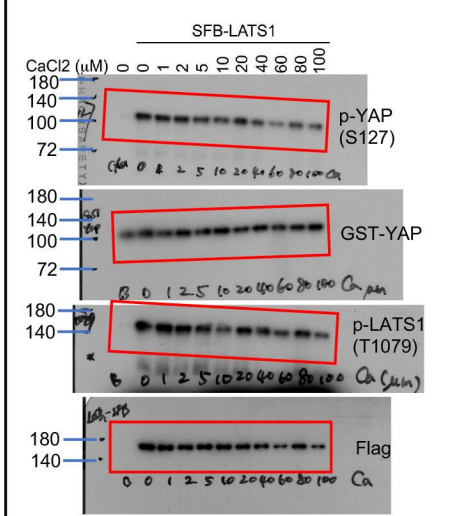**Extended Data Fig. 7l**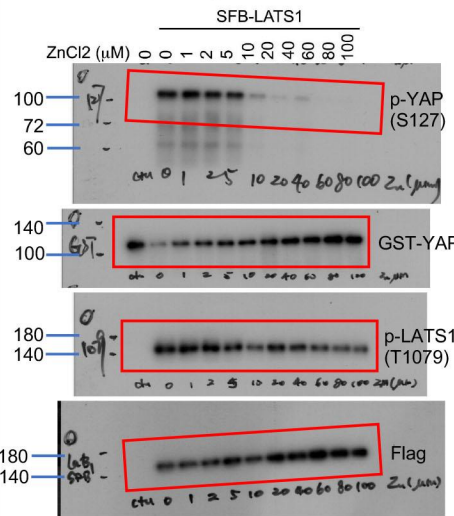**Extended Data Fig. 7m**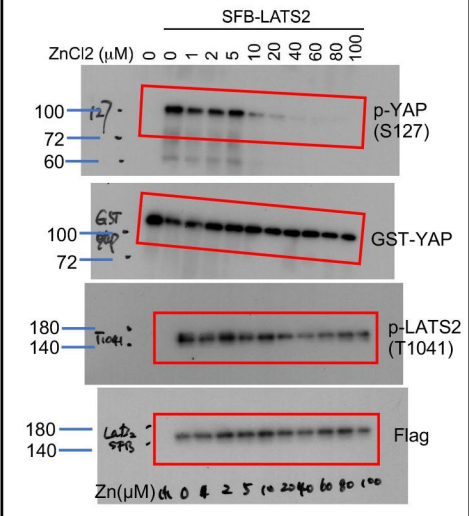

Supplement: NIHMS1789257-supplement-1789257_SD_ED_Fig_7_unprocessed_blots.pdf [file NIHMS1789257-supplement-1789257_SD_ED_Fig_7_unprocessed_blots.pdf]
