# Supplementary material
Source: PubMed Central journal article supplement (PMC9022944)

**Extended Data Fig. 1a**

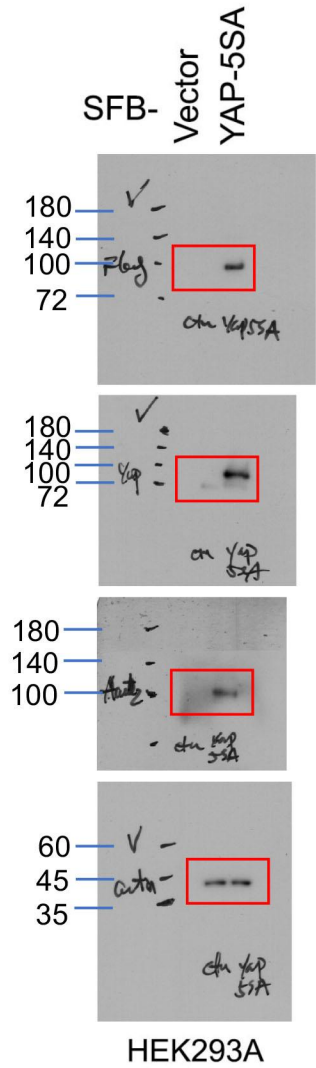

**Extended Data Fig. 1b**

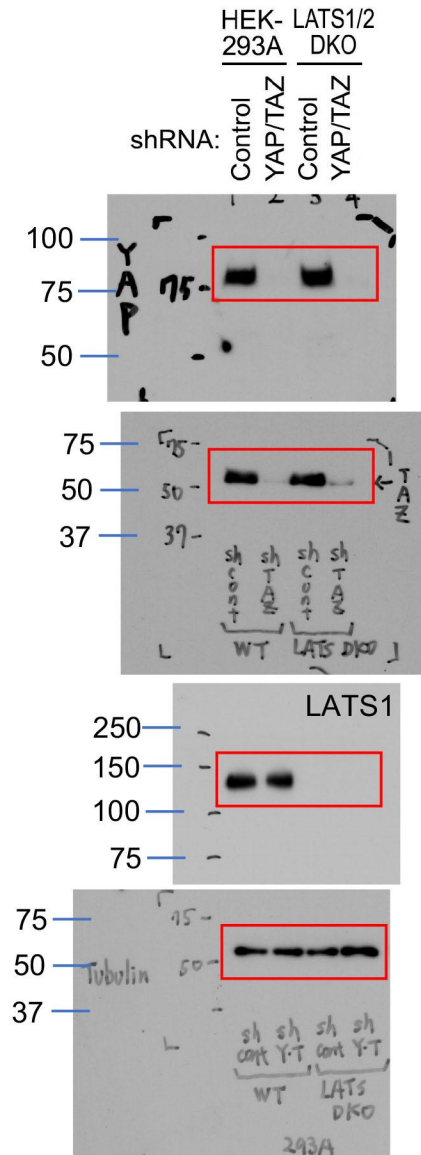

**Extended Data Fig. 1c**

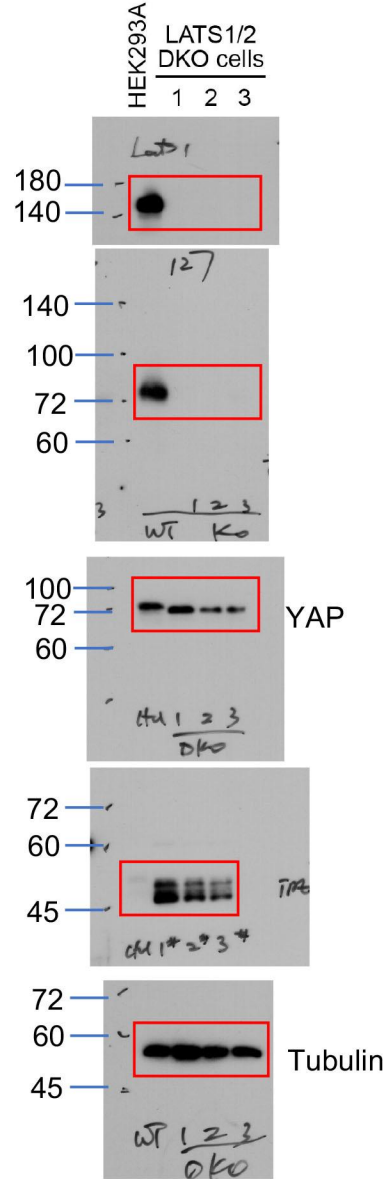

**Extended Data Fig. 1m**

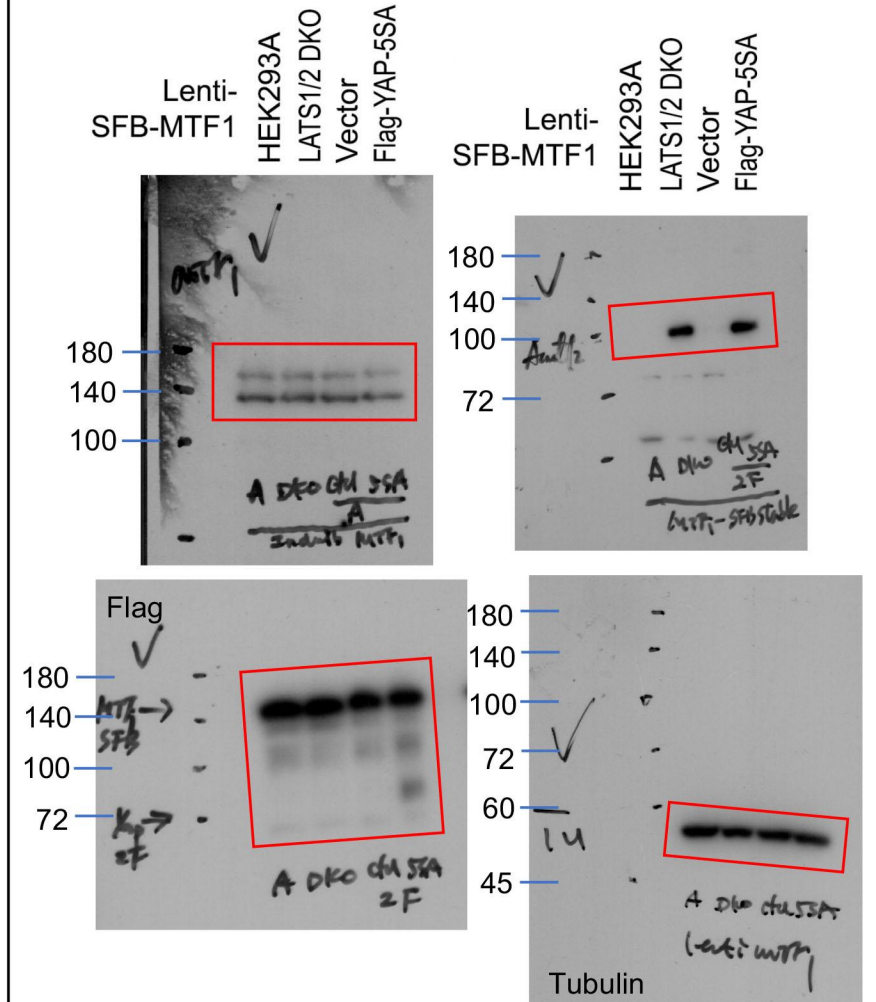

Supplement: NIHMS1789257-supplement-1789257_SD_ED_Fig_1_unprocessed_blots.pdf [file NIHMS1789257-supplement-1789257_SD_ED_Fig_1_unprocessed_blots.pdf]

### Extended Data Fig. 3c

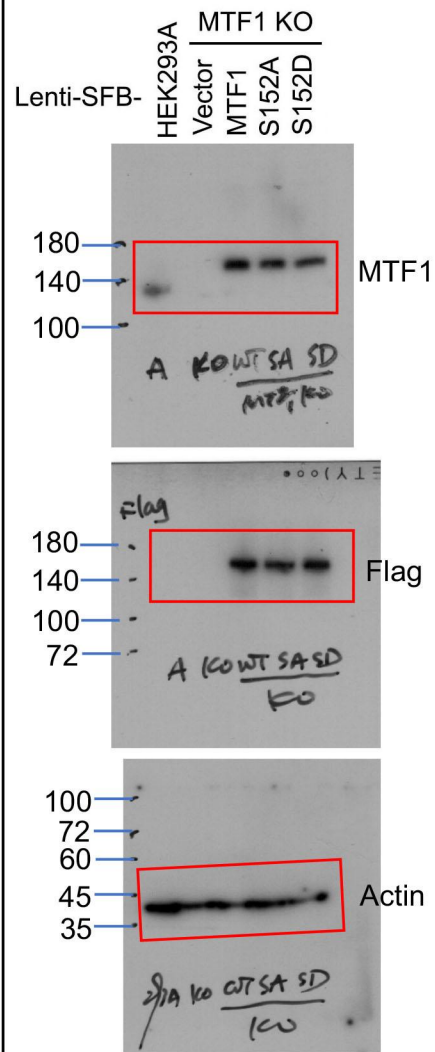

### Extended Data Fig. 3j

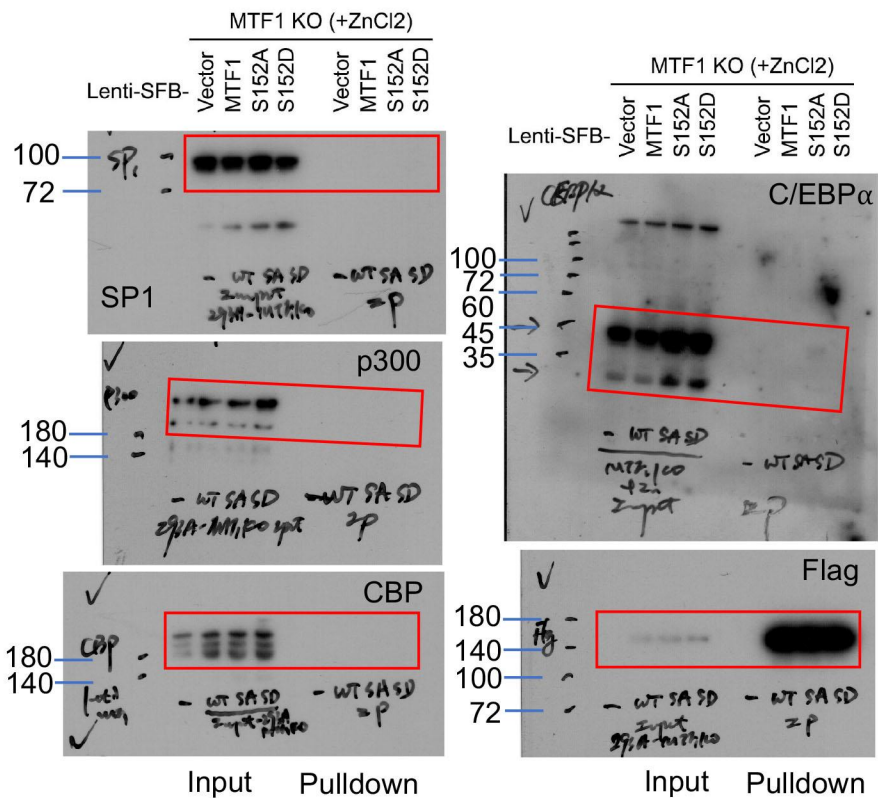

Supplement: NIHMS1789257-supplement-1789257_SD_ED_Fig_3_unprocessed_blots.pdf [file NIHMS1789257-supplement-1789257_SD_ED_Fig_3_unprocessed_blots.pdf]

## Extended Data Fig. 5b

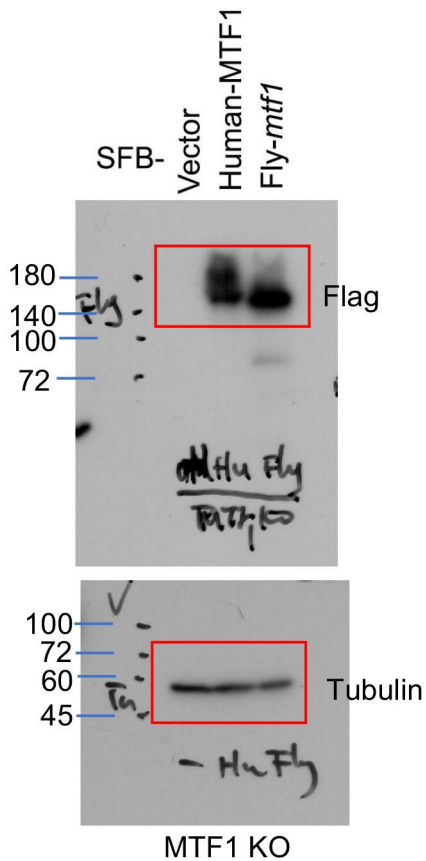

## Extended Data Fig. 5d

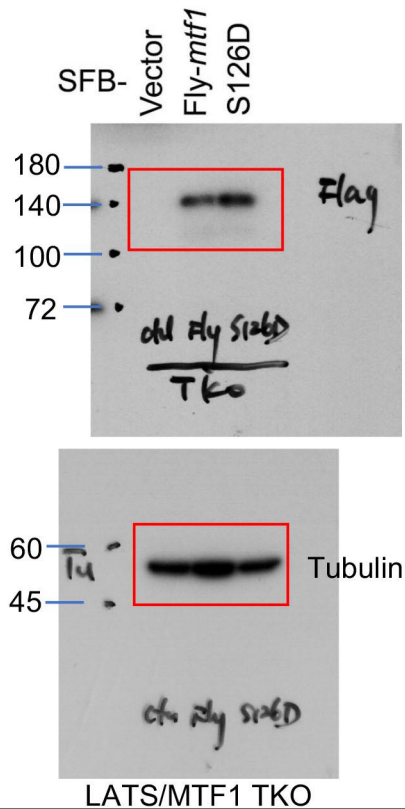

Supplement: NIHMS1789257-supplement-1789257_SD_ED_Fig_5_unprocessed_blots.pdf [file NIHMS1789257-supplement-1789257_SD_ED_Fig_5_unprocessed_blots.pdf]

**Extended Data Fig. 6a**

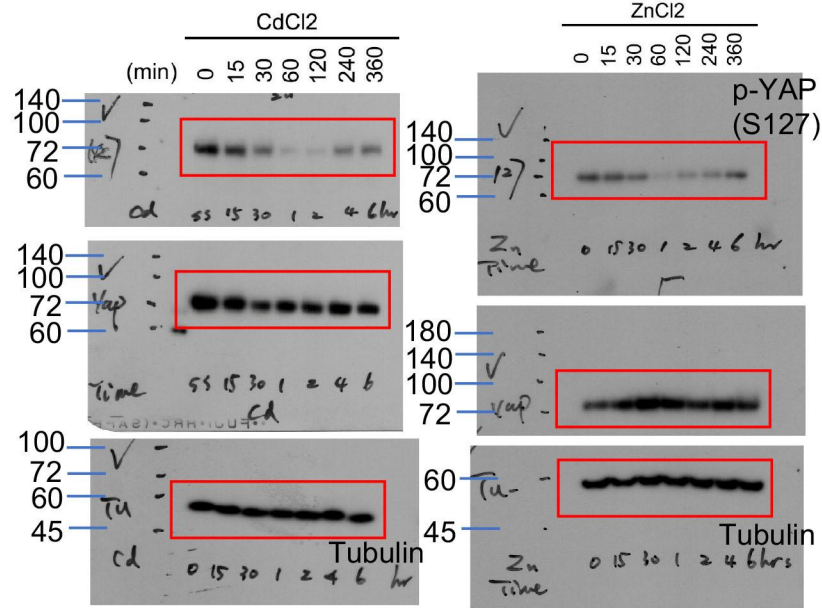

**Extended Data Fig. 6e**

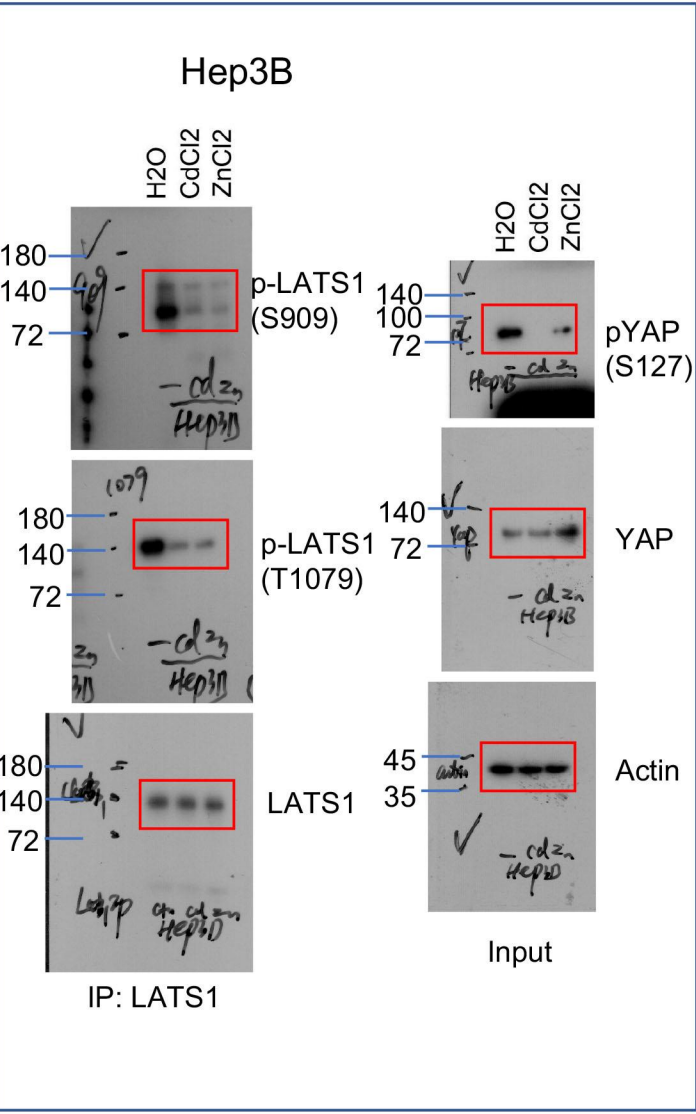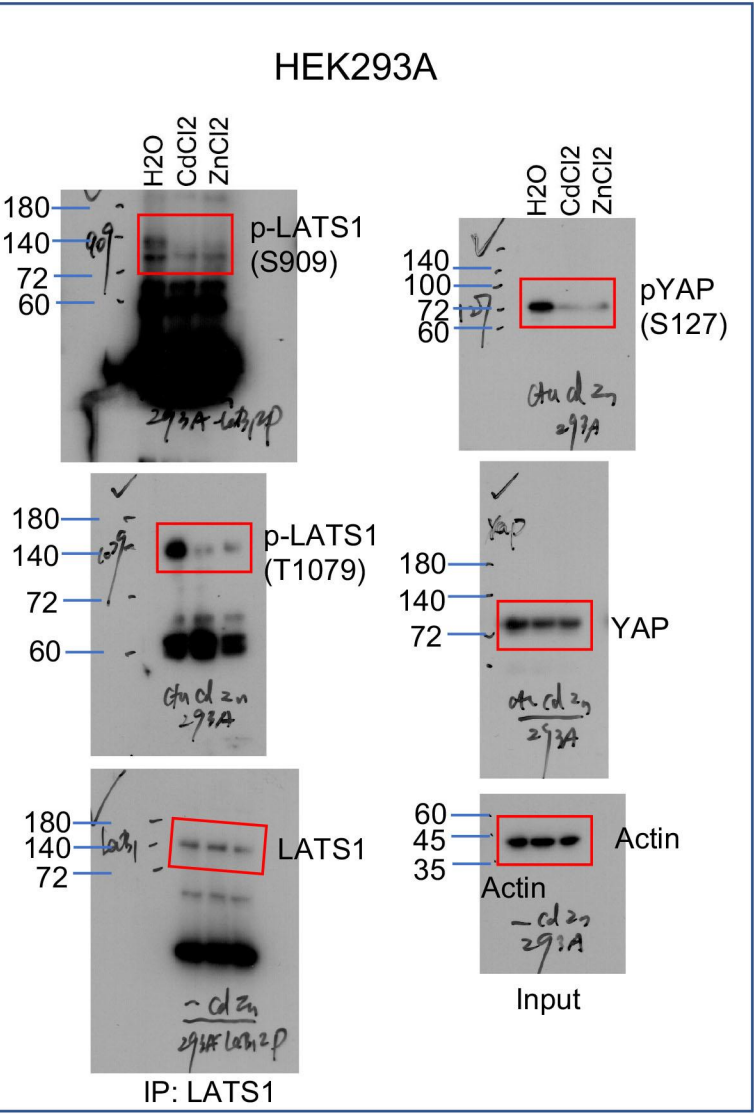

**Extended Data Fig. 6d**

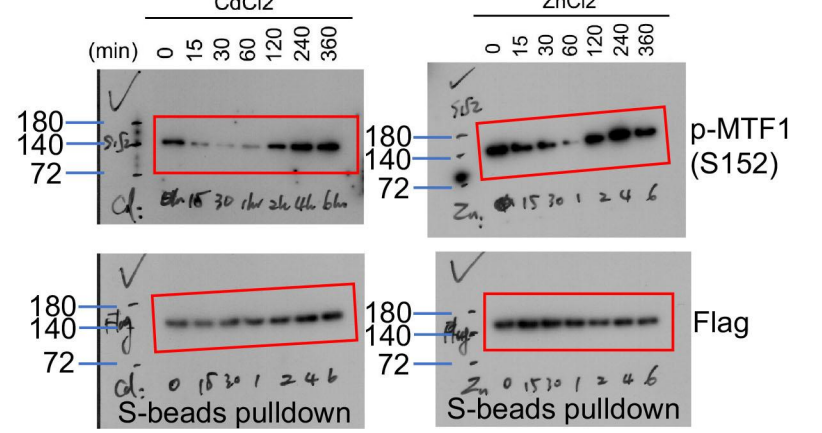

Supplement: NIHMS1789257-supplement-1789257_SD_ED_Fig_6_unprocessed_blots.pdf [file NIHMS1789257-supplement-1789257_SD_ED_Fig_6_unprocessed_blots.pdf]

**Extended Data Fig. 8a**

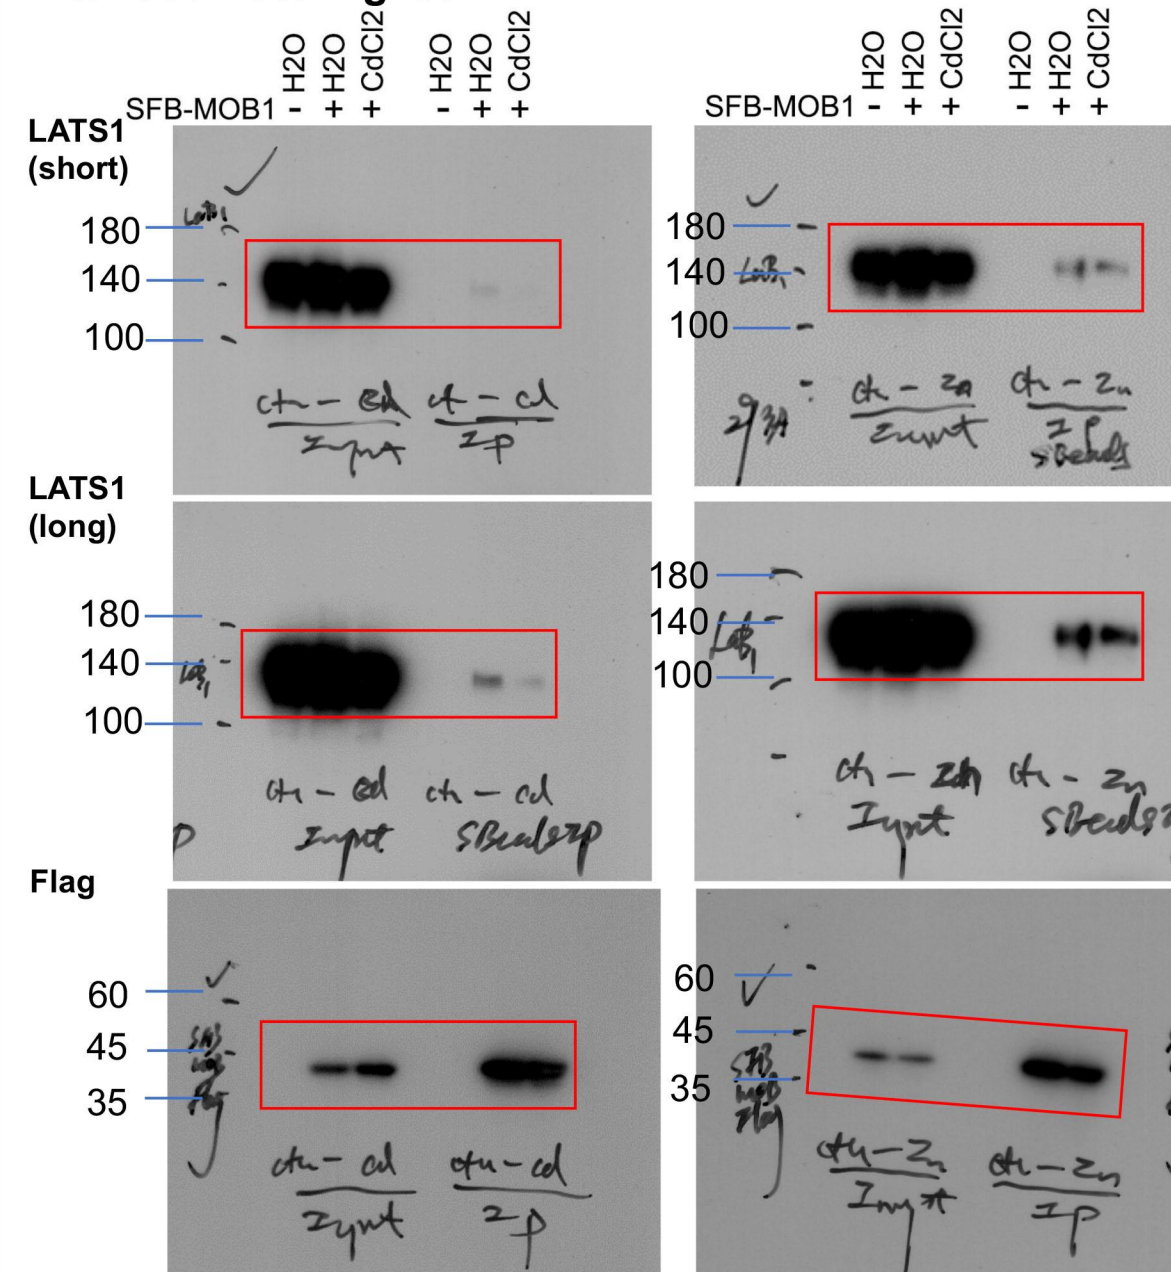

**Extended Data Fig. 8b**

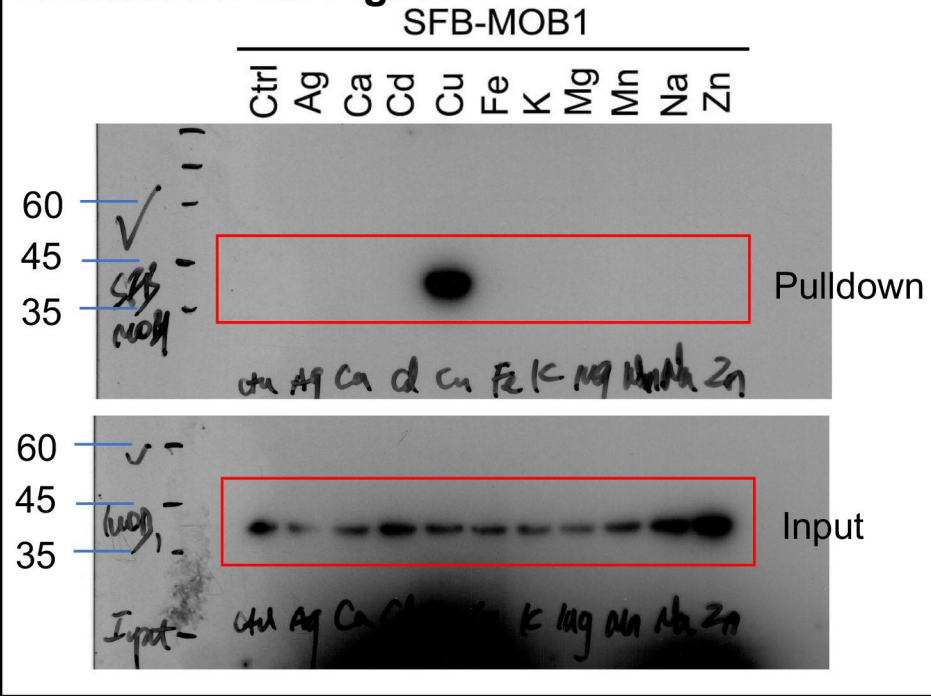

**Extended Data Fig. 8e**

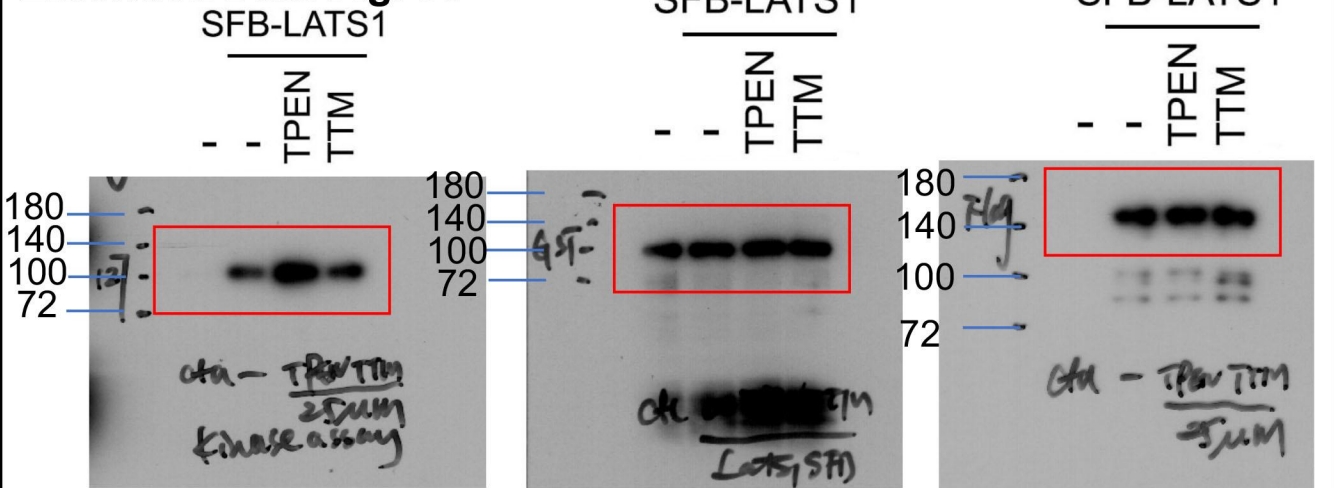

Supplement: NIHMS1789257-supplement-1789257_SD_ED_Fig_8_unprocessed_blots.pdf [file NIHMS1789257-supplement-1789257_SD_ED_Fig_8_unprocessed_blots.pdf]

**Fig. 3a**

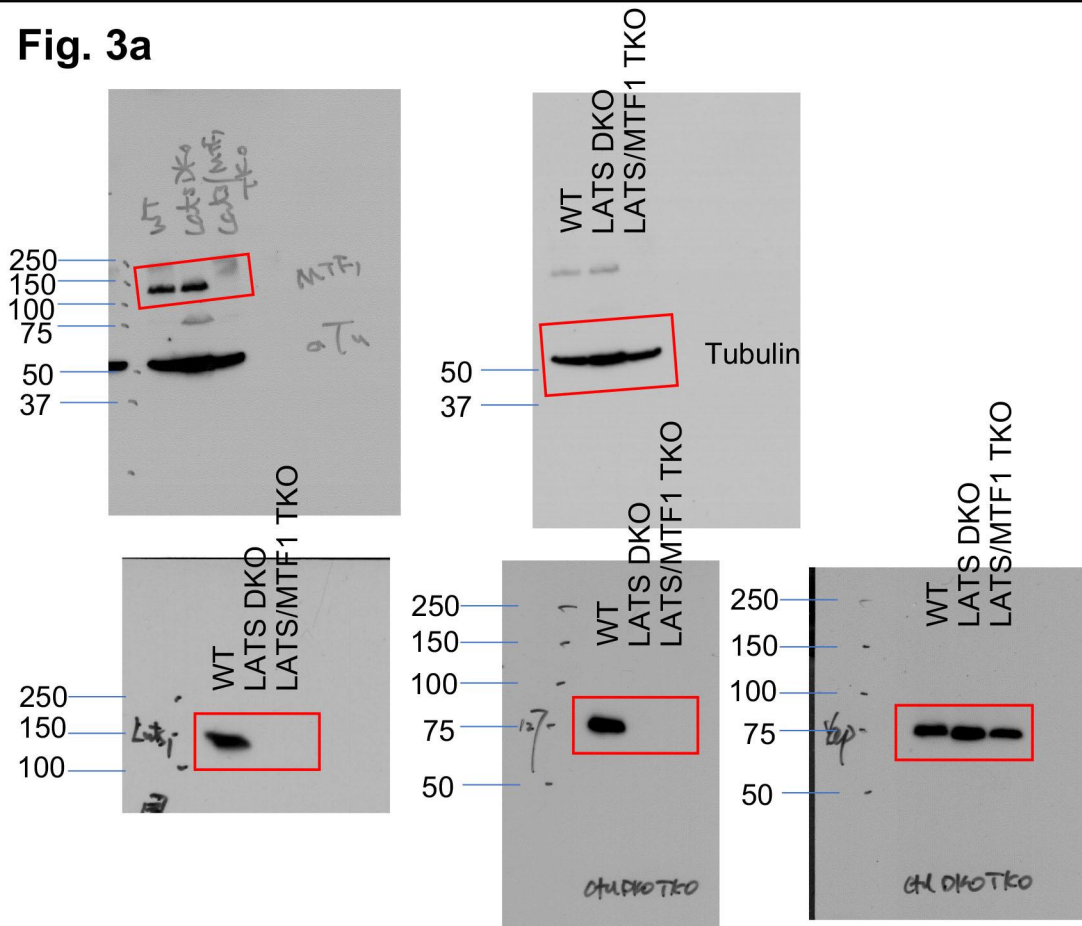

Supplement: NIHMS1789257-supplement-1789257_SD_Fig_3_unprocessed_blots.pdf [file NIHMS1789257-supplement-1789257_SD_Fig_3_unprocessed_blots.pdf]

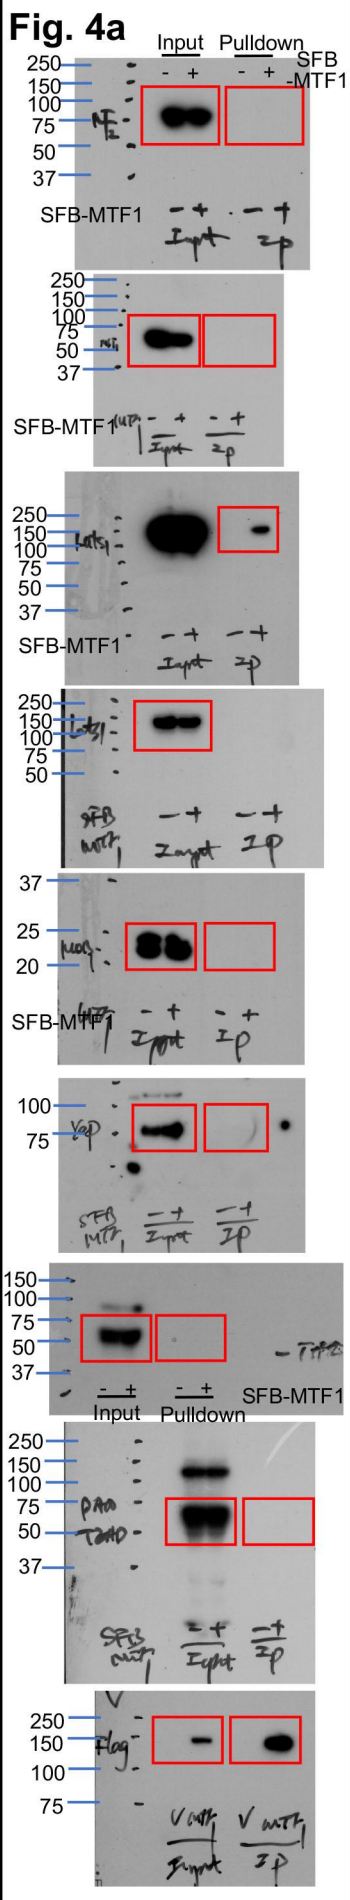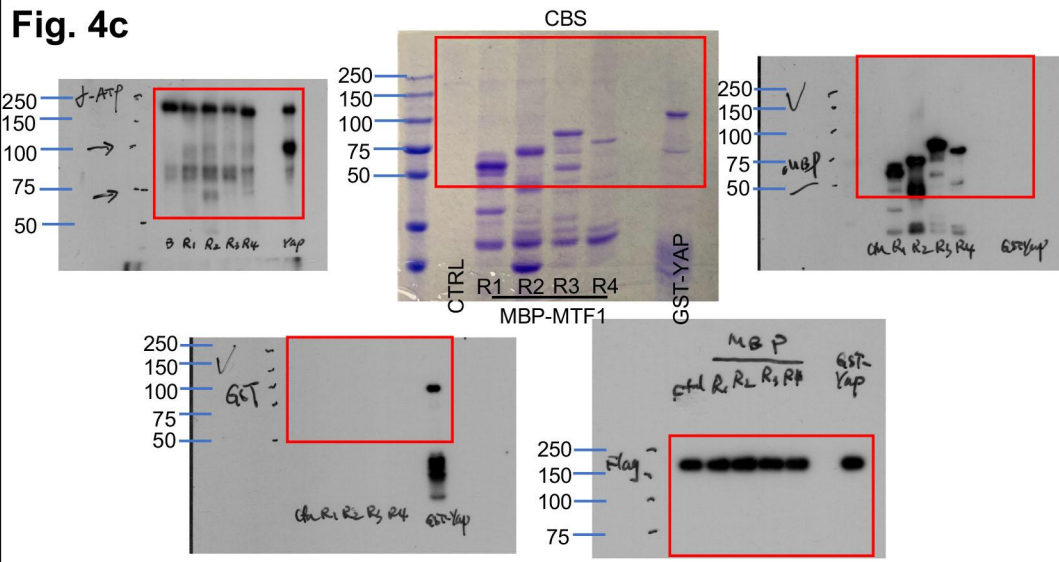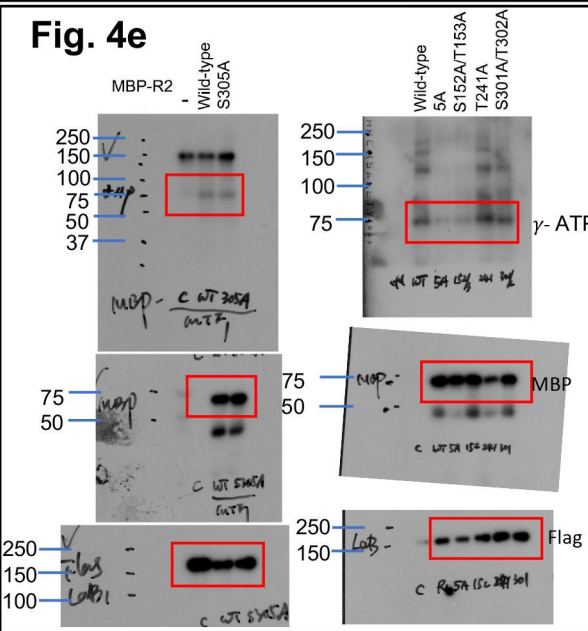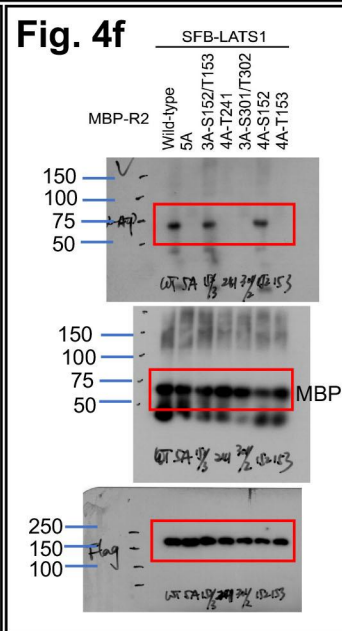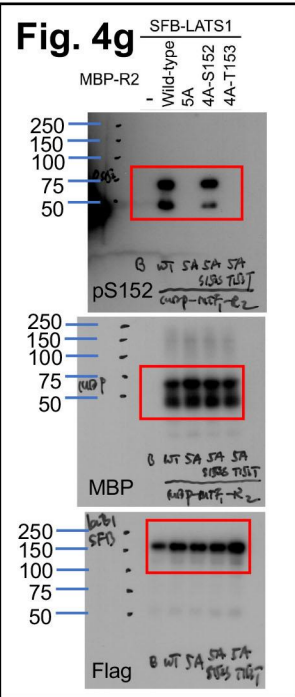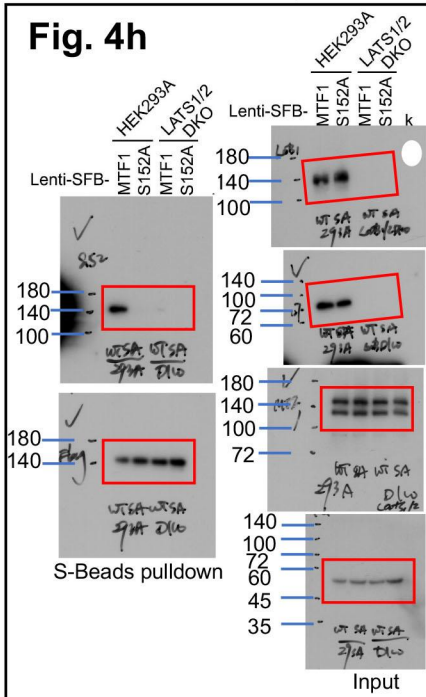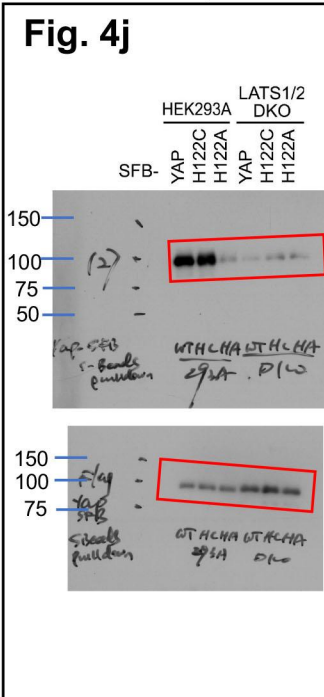

Supplement: NIHMS1789257-supplement-1789257_SD_Fig_4_unprocessed_blots.pdf [file NIHMS1789257-supplement-1789257_SD_Fig_4_unprocessed_blots.pdf]

**Fig. 5a**

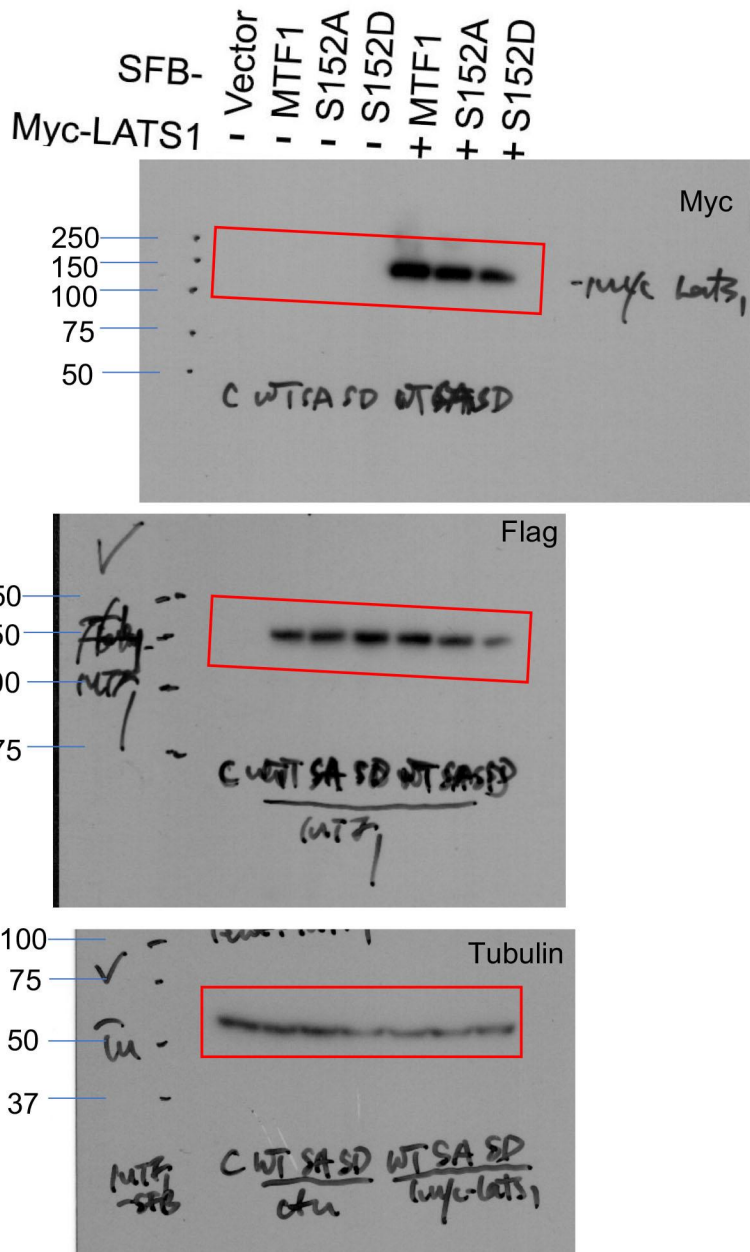

**Fig. 5d**

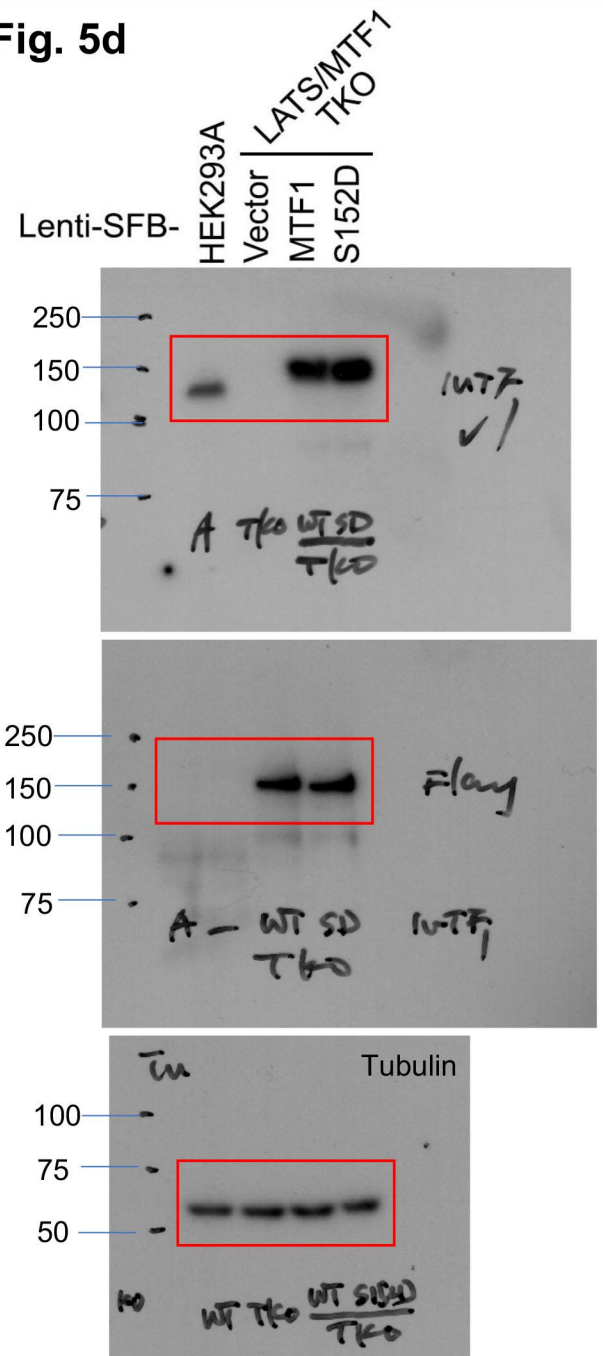

Supplement: NIHMS1789257-supplement-1789257_SD_Fig_5_unprocessed_blots5.pdf [file NIHMS1789257-supplement-1789257_SD_Fig_5_unprocessed_blots5.pdf]

# Fig. 6a

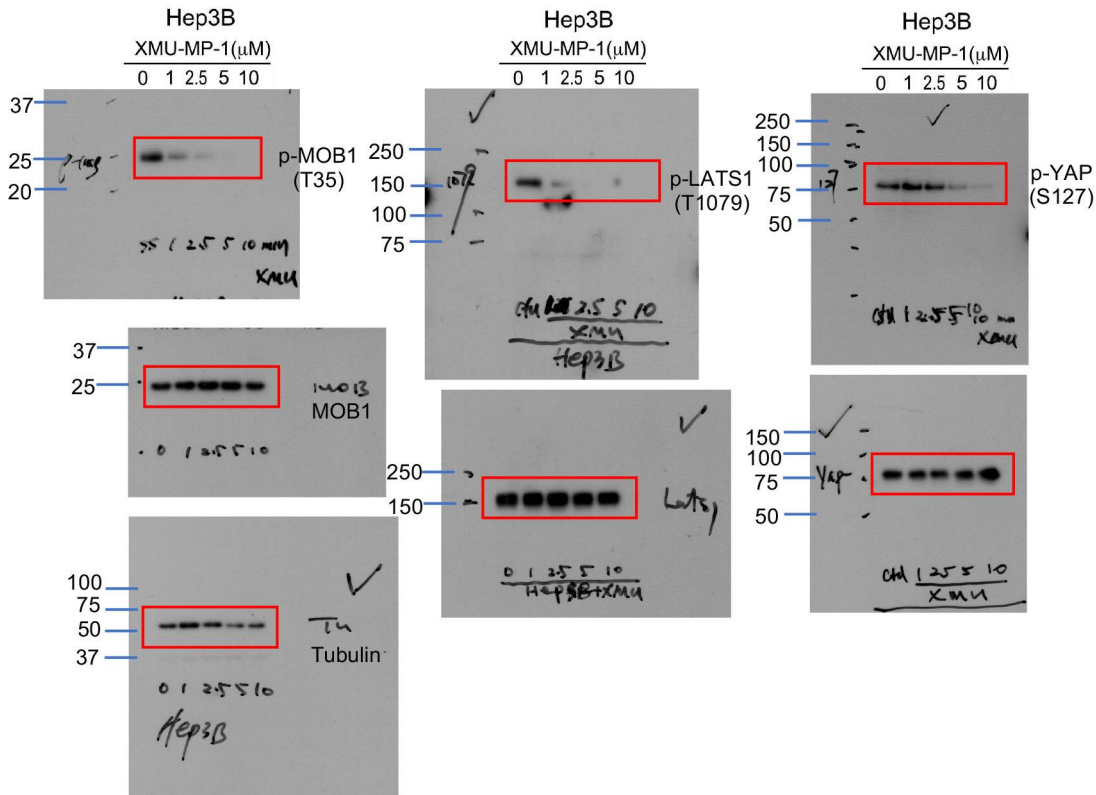

Supplement: NIHMS1789257-supplement-1789257_SD_Fig_6_unprocessed_blots.pdf [file NIHMS1789257-supplement-1789257_SD_Fig_6_unprocessed_blots.pdf]

**Fig .7a**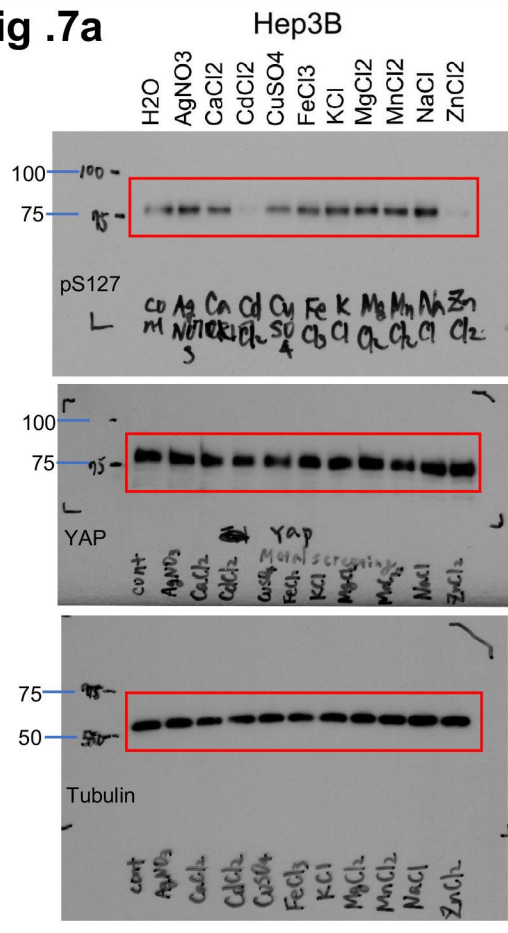**Fig .7g**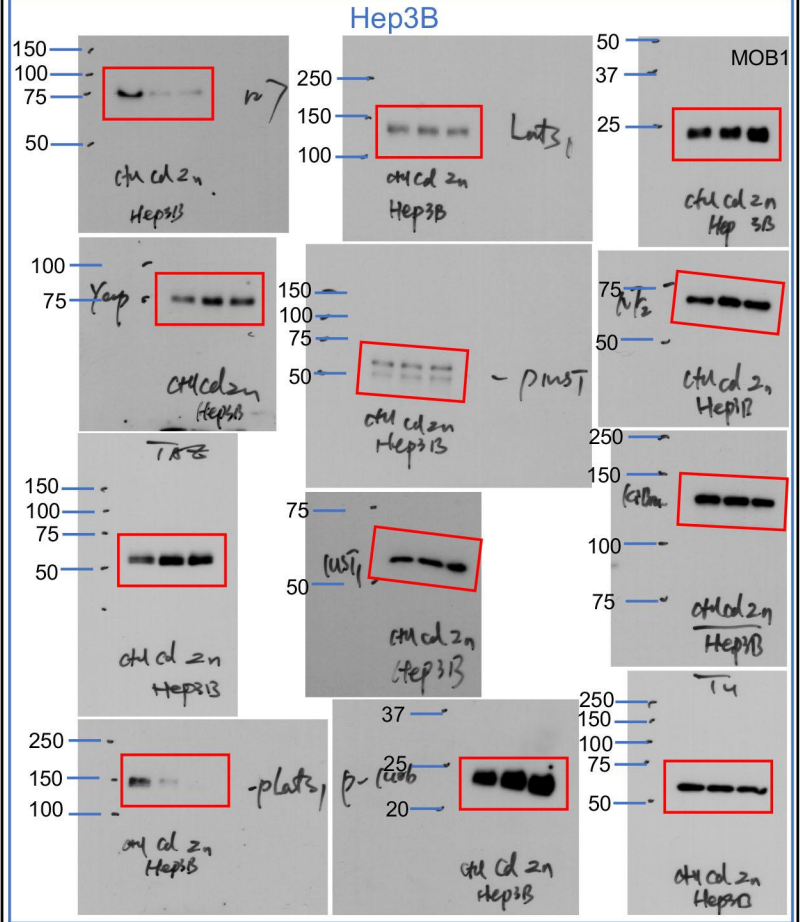**Fig .7f**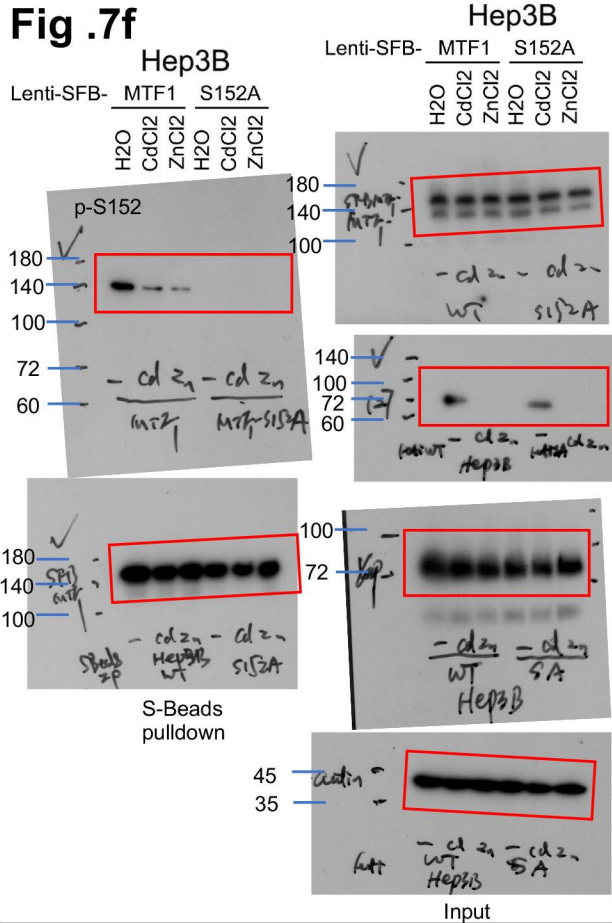**HEK293A**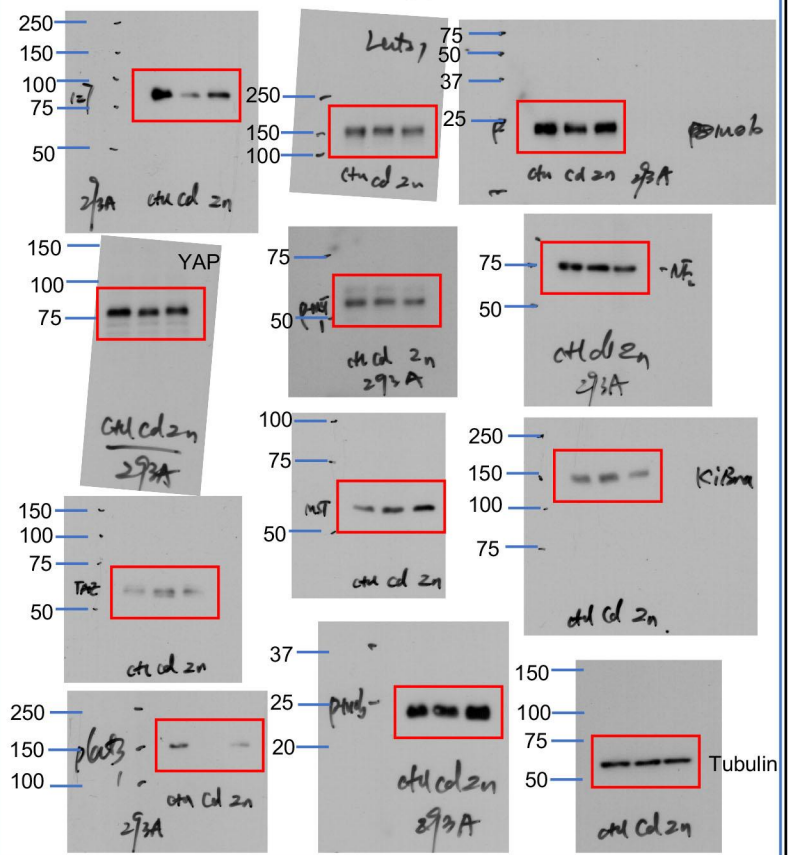

**Fig .7h**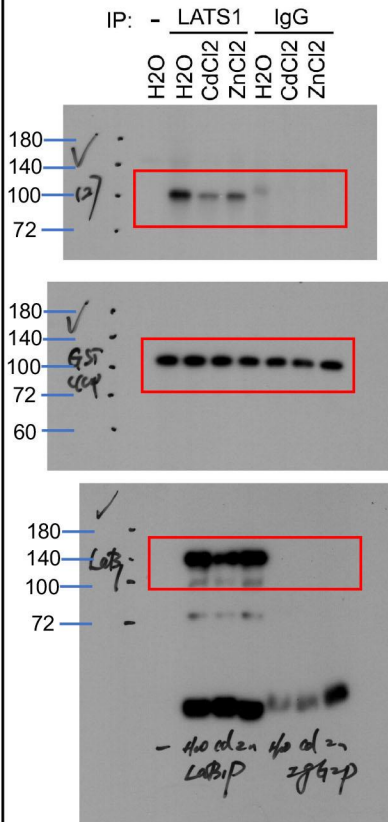**Fig .7i**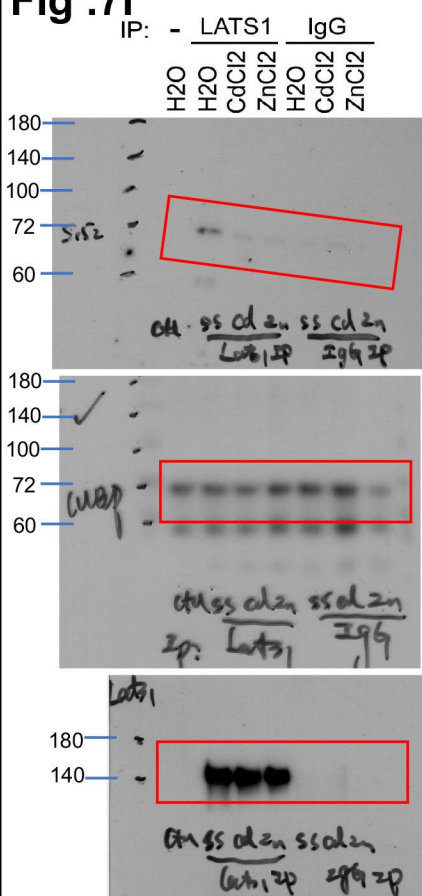**Fig .7j**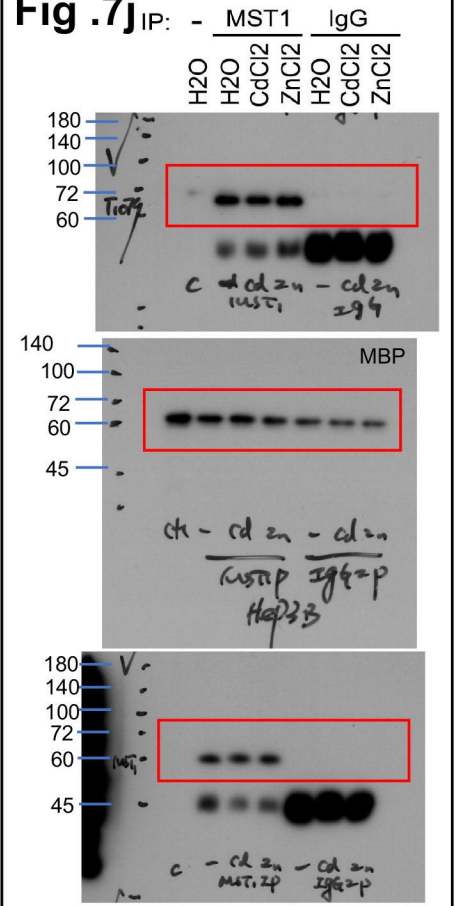**Fig .7k**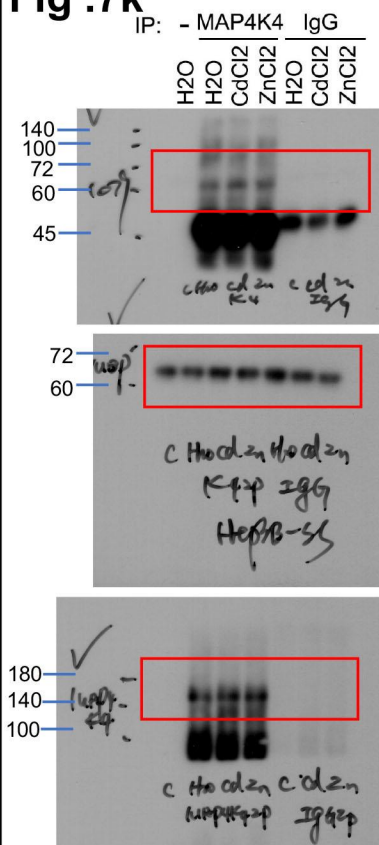**Fig .7l**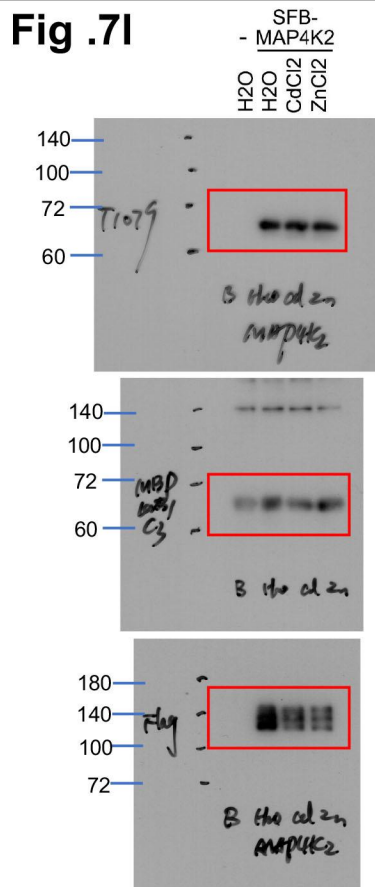**Fig .7m**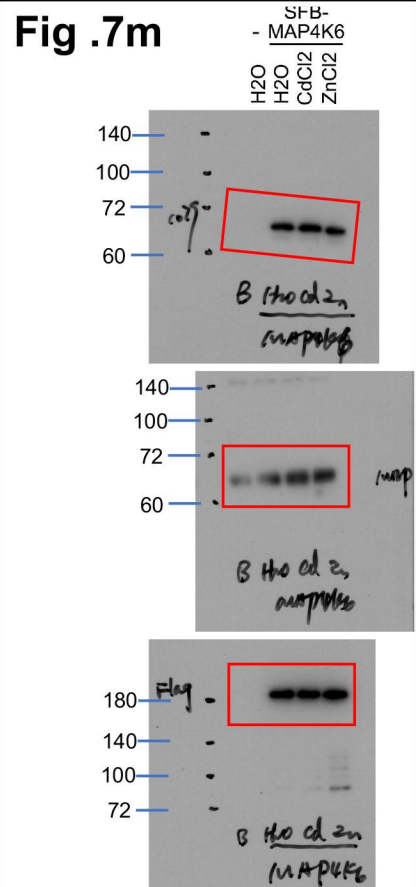

Supplement: NIHMS1789257-supplement-1789257_SD_Fig_7_unprocessed_blots.pdf [file NIHMS1789257-supplement-1789257_SD_Fig_7_unprocessed_blots.pdf]

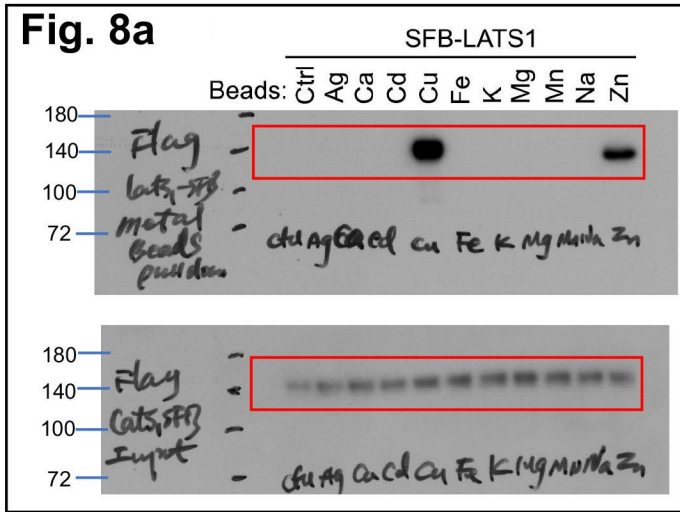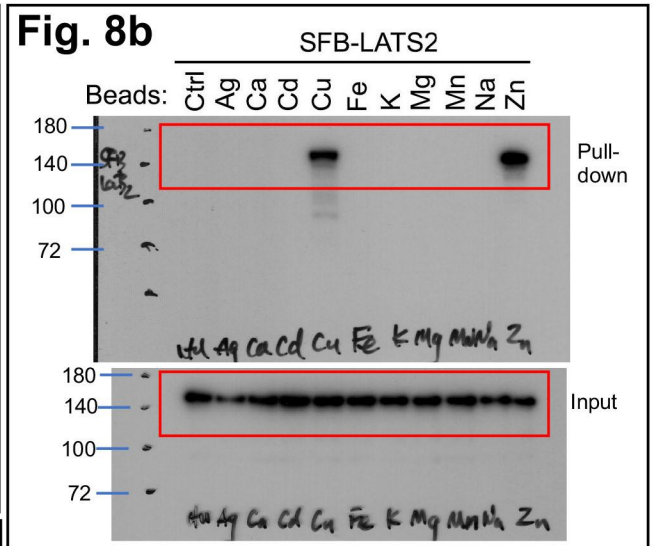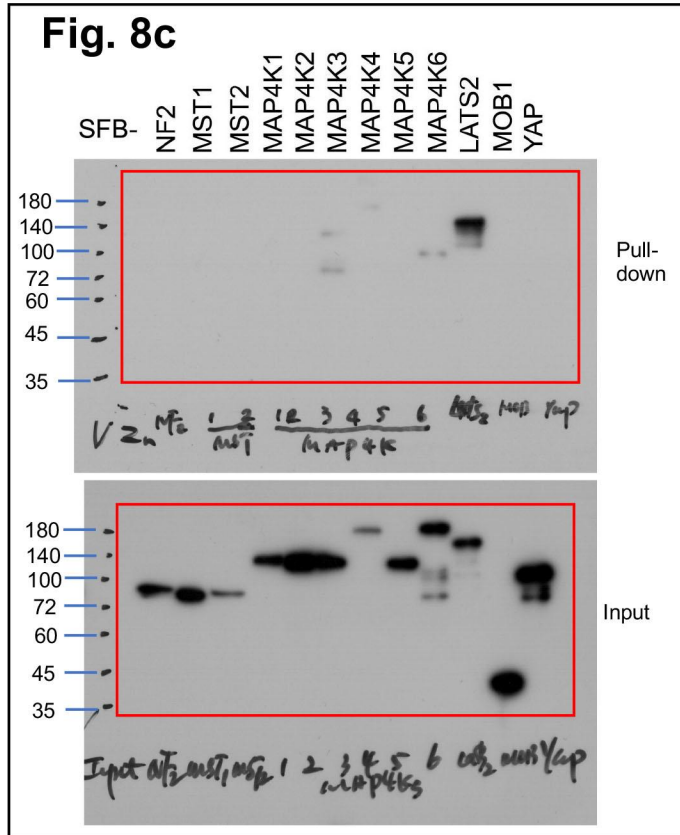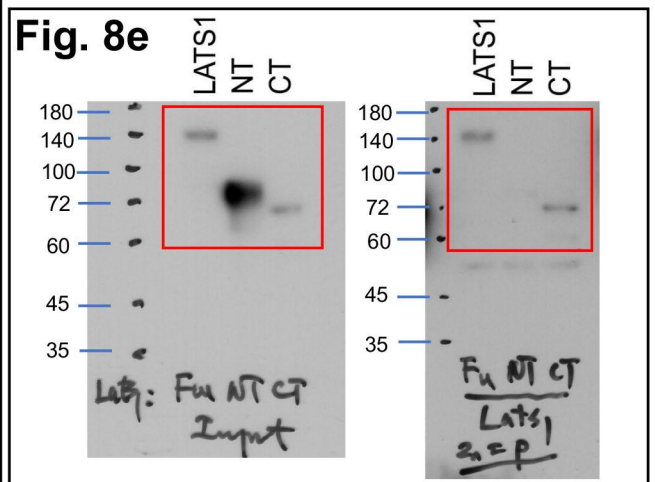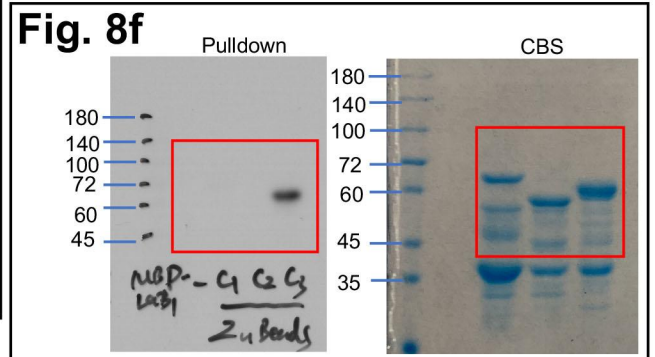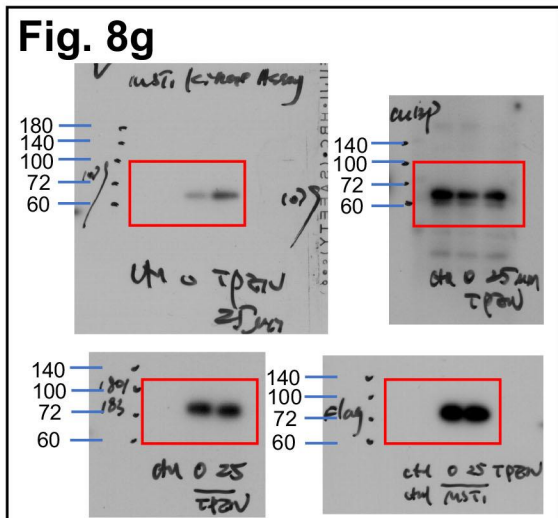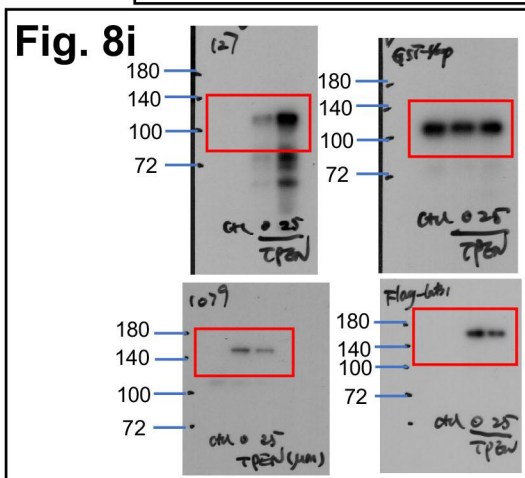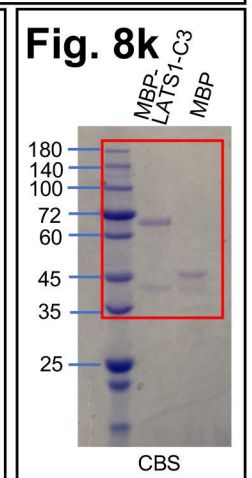

Supplement: NIHMS1789257-supplement-1789257_SD_Fig_8_unprocessed_blots.pdf [file NIHMS1789257-supplement-1789257_SD_Fig_8_unprocessed_blots.pdf]
